# Supplementary material
Source: publisher site journal article supplement (https://www.spandidos-publications.com/4586/downloadSupplementary)

Figure S1. Correlation of combined OPRPN<sup>high</sup> and SMR3A<sup>high</sup> expression with DSS and PFS. Kaplan-Meier plots show differences in DSS and PFS between the subgroup with co-expression of OPRPN<sup>high</sup> and SMR3A<sup>high</sup> (dotted line) and all others (solid line). DSS, disease-specific survival; PFS, progression-free survival; SMR3A, submaxillary gland androgen-regulated protein 3A.

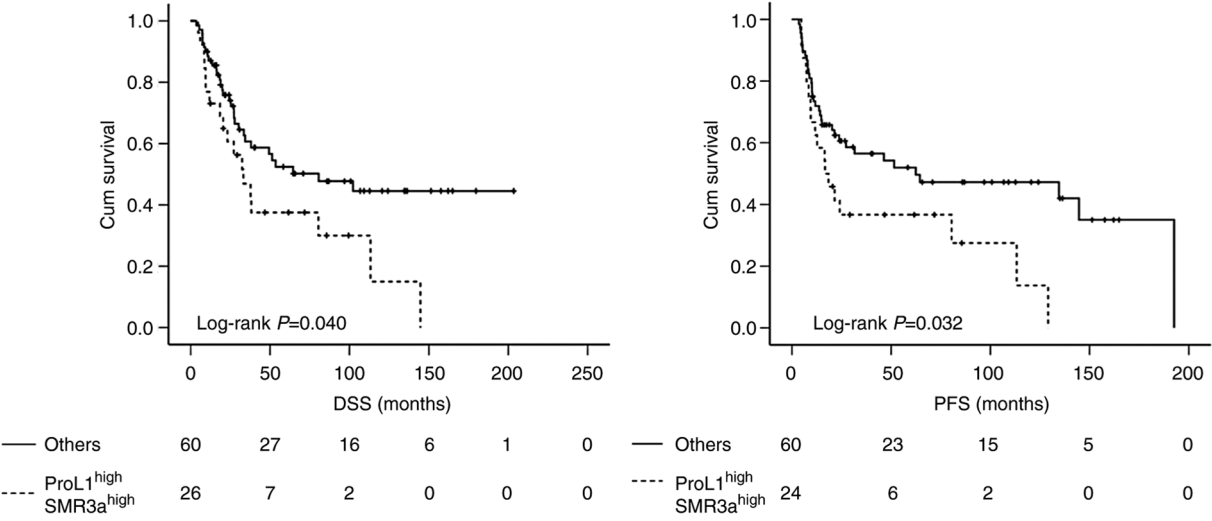

Supplement: Supplementary file 1 [file downloadSupplementary]
